# Supplementary material
Source: PubMed Central journal article supplement (PMC5885273)
Supplement: jamaneurol-75-462-s001.pdf [file jamaneurol-75-462-s001.pdf]

## Supplementary Online Content

Solomon A, Turunen H, Ngandu T, et al. Effect of the apolipoprotein E genotype on cognitive change during a multidomain lifestyle intervention: a subgroup analysis of a randomized clinical trial. *JAMA Neurol*. Published online January 22, 2018. doi:10.1001/jamaneurol.2017.4365

**eTable 1.** Sensitivity Analyses for the Primary and Main Secondary Cognitive End Points From Baseline to 24 Months

**eTable 2.** Baseline Characteristics of Participants (ITT Population)

**eTable 3.** Assessment of Best-Fitting Model Using Bayesian Information Criterion (BIC)

**eTable 4.** Results of the Best-Fitting Model

This supplementary material has been provided by the authors to give readers additional information about their work.

**eTable 1.** Sensitivity Analyses for the Primary and Main Secondary Cognitive End Points From Baseline to 24 Months

| Cognitive end point                                                     | APOE ε4     | Difference between intervention and control groups per year |         | Difference between carriers and non-carriers per year (intervention x time x APOE) |         |
|-------------------------------------------------------------------------|-------------|-------------------------------------------------------------|---------|------------------------------------------------------------------------------------|---------|
|                                                                         |             | Estimate (95% CI)                                           | P value | Estimate (95% CI)                                                                  | P value |
| <b>ITT population (intention-to-treat, all randomized participants)</b> |             |                                                             |         |                                                                                    |         |
| NTB total score                                                         | Carrier     | 0.04 (0.001-0.07)                                           | 0.043   | 0.02 (-0.02-0.07)                                                                  | 0.30    |
|                                                                         | Non-carrier | 0.01 (-0.01-0.04)                                           | 0.27    |                                                                                    |         |
| Executive functioning                                                   | Carrier     | 0.04 (-0.004-0.09)                                          | 0.07    | 0.02 (-0.04-0.08)                                                                  | 0.49    |
|                                                                         | Non-carrier | 0.02 (-0.01-0.05)                                           | 0.17    |                                                                                    |         |
| Processing speed                                                        | Carrier     | 0.03 (-0.02-0.08)                                           | 0.18    | 0.01 (-0.05-0.07)                                                                  | 0.70    |
|                                                                         | Non-carrier | 0.02 (-0.01-0.06)                                           | 0.21    |                                                                                    |         |
| Memory                                                                  | Carrier     | 0.04 (-0.02-0.10)                                           | 0.16    | 0.04 (-0.03-0.11)                                                                  | 0.27    |
|                                                                         | Non-carrier | 0.002 (-0.04-0.04)                                          | 0.93    |                                                                                    |         |
| Abbreviated Memory                                                      | Carrier     | 0.07 (0.005-0.13)                                           | 0.035   | 0.05 (-0.03-0.12)                                                                  | 0.24    |
|                                                                         | Non-carrier | 0.02 (-0.02-0.07)                                           | 0.32    |                                                                                    |         |
| <b>Participants with all cognitive assessments</b>                      |             |                                                             |         |                                                                                    |         |
| NTB total score                                                         | Carrier     | 0.04 (0.005-0.08)                                           | 0.025   | 0.03 (-0.02-0.07)                                                                  | 0.20    |
|                                                                         | Non-carrier | 0.01 (-0.01-0.04)                                           | 0.32    |                                                                                    |         |
| Executive functioning                                                   | Carrier     | 0.04 (-0.01-0.09)                                           | 0.094   | 0.02 (-0.04-0.07)                                                                  | 0.56    |
|                                                                         | Non-carrier | 0.02 (-0.01-0.06)                                           | 0.16    |                                                                                    |         |
| Processing speed                                                        | Carrier     | 0.04 (-0.01-0.09)                                           | 0.14    | 0.02 (-0.04-0.08)                                                                  | 0.57    |
|                                                                         | Non-carrier | 0.02 (-0.02-0.05)                                           | 0.26    |                                                                                    |         |
| Memory                                                                  | Carrier     | 0.05 (-0.01-0.11)                                           | 0.087   | 0.05 (-0.02-0.13)                                                                  | 0.16    |
|                                                                         | Non-carrier | 0.00001 (-0.04-0.04)                                        | 1.00    |                                                                                    |         |
| Abbreviated Memory                                                      | Carrier     | 0.08 (0.01-0.14)                                            | 0.021   | 0.06 (-0.02-0.14)                                                                  | 0.14    |
|                                                                         | Non-carrier | 0.02 (-0.03-0.06)                                           | 0.46    |                                                                                    |         |

Mixed effects regression models with maximum likelihood estimation were used to analyse change in cognitive scores from baseline to 24 months as a function of randomization group, time, APOE genotype (ε4 allele carriers versus non-carriers), and their interactions (group x time, group x APOE, time x APOE, and group x time x APOE). In these models, the difference between carriers and non-carriers per year is indicated by the randomization group x time x APOE interaction. All other estimates were determined from the models using the *lincom* post-estimation command after *xtmixed* in Stata.

Scores on the NTB total score and memory, executive functioning and processing speed domain scores are estimated mean values (standard errors) of z scores of the cognitive tests included in each cognitive outcome with higher scores indicating better performance. A positive value of the estimate of differences between intervention and control groups indicates the effect is in favor of the intervention group.

**eTable 2.** Baseline Characteristics of Participants (ITT Population)

| Characteristics                              | APOE ε4 carriers |                |                |                | ApoE ε4 non-carriers |                |                |                | p <sup>3</sup> |
|----------------------------------------------|------------------|----------------|----------------|----------------|----------------------|----------------|----------------|----------------|----------------|
|                                              | N*               | Control        | Intervention   | p <sup>1</sup> | N*                   | Control        | Intervention   | p <sup>2</sup> |                |
| <b>Demographic characteristics</b>           |                  |                |                |                |                      |                |                |                |                |
| Age at baseline, years                       | 200/189          | 68.80 (4.52)   | 69.18 (4.61)   | 0.42           | 385/401              | 69.44 (4.78)   | 69.66 (4.68)   | 0.51           | 0.051          |
| Women, N (%)                                 | 200/189          | 101 (50.50%)   | 88 (46.56%)    | 0.44           | 385/401              | 182 (47.27%)   | 178 (44.39%)   | 0.42           | 0.37           |
| Education, years                             | 200/188          | 9.77 (3.20)    | 10.31 (3.91)   | 0.14           | 384/401              | 10.12 (3.52)   | 9.78 (3.27)    | 0.16           | 0.69           |
| Married or cohabiting, N (%)                 | 200/188          | 151 (75.50%)   | 146 (77.66%)   | 0.62           | 385/401              | 293 (76.10%)   | 284 (70.82%)   | 0.09           | 0.25           |
| <b>Vascular factors</b>                      |                  |                |                |                |                      |                |                |                |                |
| Systolic blood pressure, mmHg                | 197/188          | 139.87 (16.00) | 141.63 (18.70) | 0.32           | 382/399              | 139.48 (15.52) | 139.46 (15.89) | 0.99           | 0.21           |
| Diastolic blood pressure, mmHg               | 197/188          | 79.17 (8.91)   | 81.12 (10.62)  | 0.052          | 382/399              | 80.57 (9.43)   | 80.19 (9.27)   | 0.57           | 0.67           |
| Serum total cholesterol, mmol/l              | 200/189          | 5.27 (1.09)    | 5.31(1.01)     | 0.65           | 383/401              | 5.10 (0.99)    | 5.08 (0.99)    | 0.76           | <b>0.0015</b>  |
| Fasting plasma glucose, mmol/l               | 200/189          | 6.07 (0.83)    | 6.00 (0.78)    | 0.44           | 385/401              | 6.08 (1.06)    | 6.13 (0.84)    | 0.45           | 0.23           |
| 2h oral glucose tolerance test, mmol/l       | 171/164          | 7.11 (2.09)    | 6.79 (2.16)    | 0.18           | 332/341              | 6.93 (2.24)    | 7.14 (2.22)    | 0.21           | 0.55           |
| BMI, kg/m <sup>2</sup>                       | 197/188          | 28.04 (4.92)   | 27.85 (4.37)   | 0.70           | 382/400              | 28.08 (4.61)   | 28.55 (4.57)   | 0.16           | 0.19           |
| <b>Other</b>                                 |                  |                |                |                |                      |                |                |                |                |
| Hb A1C, %                                    | 200/188          | 5.54 (0.51)    | 5.54 (0.47)    | 0.87           | 383/396              | 5.58 (0.60)    | 5.59 (0.58)    | 0.77           | 0.19           |
| CRP, mg/l                                    | 200/189          | 1.86 (2.84)    | 2.60 (5.99)    | 0.12           | 383/401              | 3.15 (10.40)   | 2.55 (5.59)    | 0.31           | 0.16           |
| HDL-C, mmol/l                                | 200/189          | 1.43 (0.40)    | 1.47 (0.39)    | 0.31           | 383/401              | 1.47 (0.37)    | 1.42 (0.38)    | 0.053          | 0.81           |
| LDL-C, mmol/l                                | 200/189          | 3.20 (0.98)    | 3.24 (0.89)    | 0.70           | 383/401              | 3.03 (0.83)    | 3.03 (0.84)    | 0.96           | <b>0.0004</b>  |
| Triglycerides, mmol/l                        | 200/189          | 1.39 (0.63)    | 1.33 (0.59)    | 0.33           | 383/401              | 1.33 (0.60)    | 1.39 (0.64)    | 0.20           | 0.87           |
| <b>Lifestyle factors</b>                     |                  |                |                |                |                      |                |                |                |                |
| Physical activity at least twice/week, N (%) | 197/186          | 140 (71.07%)   | 136 (73.12%)   | 0.66           | 381/398              | 273 (71.65%)   | 266 (66.83%)   | 0.15           | 0.32           |
| Current smokers, N (%)                       | 200/186          | 17 (8.50%)     | 18 (9.68%)     | 0.69           | 384/400              | 31 (8.07%)     | 43 (10.75%)    | 0.20           | 0.84           |
| Alcohol drinking at least once/week, N (%)   | 199/187          | 84 (42.21%)    | 79 (42.25%)    | 0.99           | 381/400              | 173 (45.41%)   | 197 (44.75%)   | 0.85           | 0.36           |
| Fish intake at least twice/week, N (%)       | 199/187          | 97 (48.74%)    | 96 (51.34%)    | 0.61           | 383/399              | 202 (52.74%)   | 214 (53.63%)   | 0.80           | 0.30           |

|                                         |         |              |              |              |         |              |               |      |              |
|-----------------------------------------|---------|--------------|--------------|--------------|---------|--------------|---------------|------|--------------|
| Daily intake of vegetables, N (%)       | 200/188 | 124 (62.00%) | 121 (64.36%) | 0.63         | 384/400 | 236 (61.46%) | 242 (60.50%)  | 0.78 | 0.47         |
| <b>Self-reported medical conditions</b> |         |              |              |              |         |              |               |      |              |
| Hypertension, N (%)                     | 198/188 | 127 (64.14%) | 131 (69.68%) | 0.25         | 380/397 | 252 (66.32%) | 263 (66.25%)  | 0.98 | 0.85         |
| Hypercholesterolemia, N (%)             | 199/187 | 141 (70.85%) | 128 (68.45%) | 0.61         | 382/399 | 260 (68.06%) | 257 (64.41%)  | 0.28 | 0.23         |
| Diabetes, N (%)                         | 199/188 | 29 (14.57%)  | 26 (13.83%)  | 0.83         | 383/399 | 46 (12.01%)  | 59 (14.79%)   | 0.26 | 0.71         |
| History of myocardial infarction, N (%) | 199/189 | 11 (5.53%)   | 10 (5.29%)   | 0.92         | 383/399 | 19 (4.96%)   | 21 (5.26%)    | 0.85 | 0.83         |
| History of stroke, N (%)                | 199/187 | 8 (4.02%)    | 11 (5.88%)   | 0.40         | 382/399 | 23 (6.02%)   | 20 (5.01%)    | 0.54 | 0.68         |
| <b>Cognition</b>                        |         |              |              |              |         |              |               |      |              |
| NTB total score, baseline               | 200/189 | 0.02 (0.59)  | -0.07 (0.59) | 0.15         | 384/401 | 0.02 (0.58)  | -0.02 (0.55)  | 0.33 | 0.44         |
| NTB total score, month 12               | 187/170 | 0.11 (0.67)  | 0.04 (0.66)  | 0.32         | 363/367 | 0.15 (0.66)  | 0.14 (0.61)   | 0.84 | 0.099        |
| NTB total score, month 24               | 180/159 | 0.16 (0.70)  | 0.15 (0.72)  | 0.97         | 348/357 | 0.24 (0.68)  | 0.23 (0.65)   | 0.77 | 0.072        |
| Executive functioning, baseline         | 199/189 | -0.02 (0.70) | -0.05 (0.67) | 0.72         | 384/401 | 0.02 (0.68)  | -0.03 (0.66)  | 0.30 | 0.48         |
| Executive functioning, month 12         | 186/168 | 0.04 (0.75)  | -0.02 (0.68) | 0.41         | 362/366 | 0.08 (0.74)  | 0.08 (0.68)   | 0.90 | 0.15         |
| Executive functioning, month 24         | 179/159 | 0.04 (0.74)  | 0.09 (0.75)  | 0.53         | 345/356 | 0.14 (0.72)  | 0.11 (0.70)   | 0.57 | 0.20         |
| Memory, baseline                        | 200/189 | 0.07 (0.65)  | -0.08 (0.74) | <b>0.033</b> | 384/401 | 0.02 (0.66)  | -0.01 (0.66)  | 0.66 | 0.77         |
| Memory, month 12                        | 187/170 | 0.21 (0.77)  | 0.09 (0.83)  | 0.16         | 363/368 | 0.24 (0.77)  | 0.21 (0.76)   | 0.66 | 0.12         |
| Memory, month 24                        | 181/159 | 0.29 (0.85)  | 0.25 (0.93)  | 0.72         | 348/357 | 0.40 (0.78)  | 0.40 (0.77)   | 0.90 | <b>0.018</b> |
| Processing speed, baseline              | 200/189 | 0.01 (0.86)  | -0.07 (0.83) | 0.32         | 384/401 | 0.04 (0.83)  | -0.02 (0.78)  | 0.35 | 0.45         |
| Processing speed, month 12              | 187/170 | 0.05 (0.89)  | 0.03 (0.89)  | 0.86         | 363/367 | 0.08 (0.84)  | 0.06 (0.78)   | 0.78 | 0.58         |
| Processing speed, month 24              | 179/159 | 0.07 (0.93)  | 0.06 (0.82)  | 0.94         | 348/357 | 0.11 (0.89)  | 0.10 (0.86)   | 0.87 | 0.53         |
| Abbreviated memory, baseline            | 195/186 | 0.05 (0.75)  | -0.08 (0.79) | 0.12         | 376/396 | 0.03 (0.73)  | -0.003 (0.79) | 0.57 | 0.61         |
| Abbreviated memory, month 12            | 175/167 | 0.08 (0.79)  | 0.02 (0.81)  | 0.51         | 353/354 | 0.10 (0.78)  | 0.12 (0.81)   | 0.70 | 0.24         |
| Abbreviated memory, month 24            | 174/153 | 0.17 (0.87)  | 0.21 (0.92)  | 0.66         | 341/350 | 0.25 (0.79)  | 0.28 (0.80)   | 0.65 | 0.18         |

Values are means (SD) unless otherwise specified. \* N is number of participants in control / intervention group.  $p^1$  - p value for differences between intervention and control groups among APOE  $\epsilon 4$  carriers;  $p^2$  - p value for differences between intervention and control groups among APOE  $\epsilon 4$  non-carriers;  $p^3$  - p value for differences between all APOE  $\epsilon 4$  carriers and non-carriers.

The number (%) of APOE  $\epsilon 4$  carriers was 189 (32.0%) in the intervention group, and 200 (34.2%) in the control group ( $p=0.43$ ).

**Table 3.** Assessment of Best-Fitting Model Using Bayesian Information Criterion (BIC)

| Full model                                                                                                                  | NTB total score                                      | Executive functioning | Processing speed      | Memory                | Abbreviated memory    |
|-----------------------------------------------------------------------------------------------------------------------------|------------------------------------------------------|-----------------------|-----------------------|-----------------------|-----------------------|
|                                                                                                                             | BIC                                                  |                       |                       |                       |                       |
| - Randomization group<br>- APOE4<br>- Time<br>- Group x time<br>- Group x APOE4<br>- Time x APOE4<br>- Group x time x APOE4 | 2728.36                                              | 4322.95               | 5093.39               | 5236.05               | 5726.04               |
| <b>Alternative models</b>                                                                                                   | <b>BIC (*p-value for comparison with full model)</b> |                       |                       |                       |                       |
| <b>Model 1</b><br>- Randomization group<br>- APOE4<br>- Time<br>- Group x time<br>- Group x APOE4<br>- Time x APOE4         | 2721.34 (0.30)                                       | 4315.48 (0.44)        | 5085.48 (0.68)        | 5229.21 (0.27)        | 5719.45 (0.22)        |
| <b>Model 2</b><br>- Randomization group<br>- APOE4<br>- Time<br>- Group x time<br>- Time x APOE4                            | <b>2714.27 (0.35)</b>                                | 4307.41 (0.74)        | 5077.48 (0.88)        | <b>5223.34 (0.18)</b> | 5712.42 (0.29)        |
| <b>Model 3</b><br>- Randomization group<br>- APOE4<br>- Time<br>- Group x time<br>- Group x APOE4                           | 2724.45 (0.002)                                      | 4309.44 (0.27)        | 5078.29 (0.59)        | 5233.49 (0.001)       | 5713.70 (0.15)        |
| <b>Model 4</b><br>- Randomization group<br>- APOE4<br>- Time<br>- Group x time                                              | 2717.40 (0.004)                                      | <b>4301.37 (0.45)</b> | <b>5070.28 (0.77)</b> | 5227.63 (0.001)       | <b>5706.66 (0.19)</b> |

$BIC = -2 * \log\text{-likelihood} + \log(\text{number of observations}) * (\text{number of estimated parameters})$

The best fitting mixed effects regression model (lowest BIC, bold font) was determined by performing likelihood-ratio tests and comparing the full model with alternative models excluding non-significant interaction terms.

\* p value from likelihood ratio test comparing each alternative model with the full model.

All analyses were conducted in the main population (mITT). All tested models included the main effects of randomization group, time, and APOE, as well as the intervention effect (randomization group x time interaction).

**eTable 4.** Results of the Best-Fitting Model

| Best fitting model  | NTB total score                    | Executive functioning            | Processing speed                 | Memory                             | Abbreviated memory               |
|---------------------|------------------------------------|----------------------------------|----------------------------------|------------------------------------|----------------------------------|
|                     | Estimate (95% CI), p-value         |                                  |                                  |                                    |                                  |
| Randomization group | -0.058 (-0.125-0.010)<br>p=0.093   | -0.055 (-0.134-0.024)<br>p=0.171 | -0.059 (-0.153-0.035)<br>p=0.219 | -0.063 (-0.142-0.015)<br>p=0.115   | -0.056 (-0.145-0.032)<br>p=0.213 |
| APOE4               | -0.019 (-0.091-0.052)<br>p=0.600   | -0.047 (-0.130-0.036)<br>p=0.266 | -0.019 (-0.118-0.081)<br>p=0.711 | -0.003 (-0.086-0.081)<br>p=0.947   | -0.037 (-0.128-0.053)<br>p=0.421 |
| Time                | 0.093 (0.077-0.109)<br>p<0.001     | 0.029 (0.010-0.047)<br>p=0.003   | 0.018 (-0.001-0.038)<br>p=0.068  | 0.178 (0.151-0.205)<br>p<0.001     | 0.085 (0.059-0.111)<br>p<0.001   |
| Group x time        | 0.021 (0.001-0.042)<br>p=0.042     | 0.030 (0.004-0.057)<br>p=0.025   | 0.026 (-0.002-0.054)<br>p=0.072  | 0.015 (-0.019-0.048)<br>p=0.397    | 0.038 (0.001-0.075)<br>p=0.041   |
| Time x APOE4        | -0.038 (-0.060- -0.016)<br>p=0.001 | N.A.                             | N.A.                             | -0.065 (-0.101- -0.029)<br>p<0.001 | N.A.                             |

The best fitting mixed effects regression model is based on the lowest Bayesian Information Criterion (BIC) shown in Table S3. N.A. - not applicable.
